# Supplementary material for: Forehead or ear temperature measurement cannot replace rectal measurements, except for screening purposes
Source: PubMed Central journal article supplement (PMC5787302; doi:10.1186/s12887-018-0994-1), 2018-01-26
Supplement: 12887_2018_994_MOESM1_ESM.pdf [file 12887_2018_994_MOESM1_ESM.pdf]

Additional file.

**Sample size calculation:**

We used <http://www.openepi.com/SampleSize/SSMean.htm>

The calculation assumes normal distribution.

We assumed that the standard deviation of temperature measurements was 0.65 °C in accordance with formerly published results. <https://www.ncbi.nlm.nih.gov/pubmed/15502654>

We aimed at a sample size of minimum 99 children within each of the six age groups to be able to detect a minimum mean difference of +/- 0.3 °C with a standard deviation of 0.65 °C between the rectal and the alternative measurement, a 90% power, and a significance level of 0.05.

Calculation:

The screenshot shows the OpenEpi website interface. On the left is a navigation menu with categories like 'Info and Help', 'Counts', 'Person Time', 'Continuous Variables', 'Sample Size', 'Power', 'Random numbers', 'Searches', and 'Development'. The 'Sample Size' category is expanded, and 'Mean Difference' is selected. The main content area has tabs for 'Start', 'Enter', 'Results', 'Examples', and 'Help'. The 'Results' tab is active, displaying the following information:

### Sample Size For Comparing Two Means

**Input Data**

|                                        |     |
|----------------------------------------|-----|
| Confidence Interval (2-sided)          | 95% |
| Power                                  | 90% |
| Ratio of sample size (Group 2/Group 1) | 1   |

|                    | Group 1 | Group 2 | Difference* |
|--------------------|---------|---------|-------------|
| Mean               |         |         | 0.3         |
| Standard deviation | 0.65    | 0.65    |             |
| Variance           | 0.4225  | 0.4225  |             |

---

|                        |     |
|------------------------|-----|
| Sample size of Group 1 | 99  |
| Sample size of Group 2 | 99  |
| Total sample size      | 198 |

\*Difference between the means

Results from OpenEpi, Version 3, open source calculator--SSMean  
Print from the browser with ctrl-P  
or select text to copy and paste to other programs.

Our results of the study confirmed the assumption of normal distribution within all groups of children.

We used STATA 14. Qnorm function to assess this:

Total cohort:

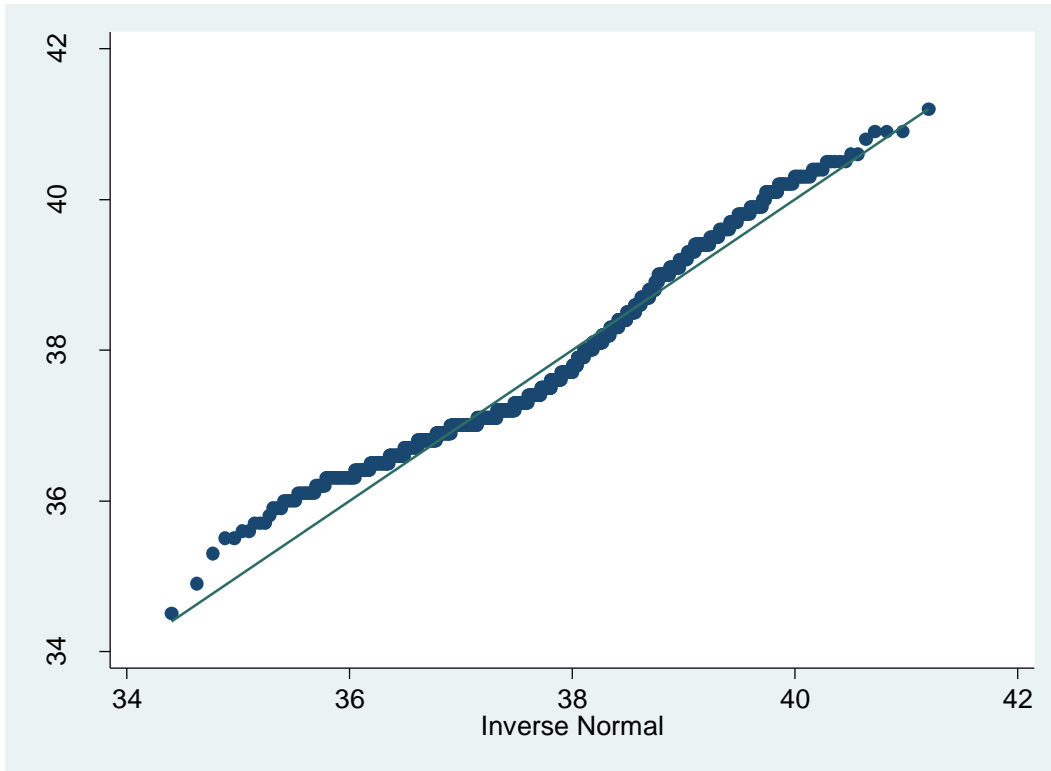

Agegroup

0-5 months

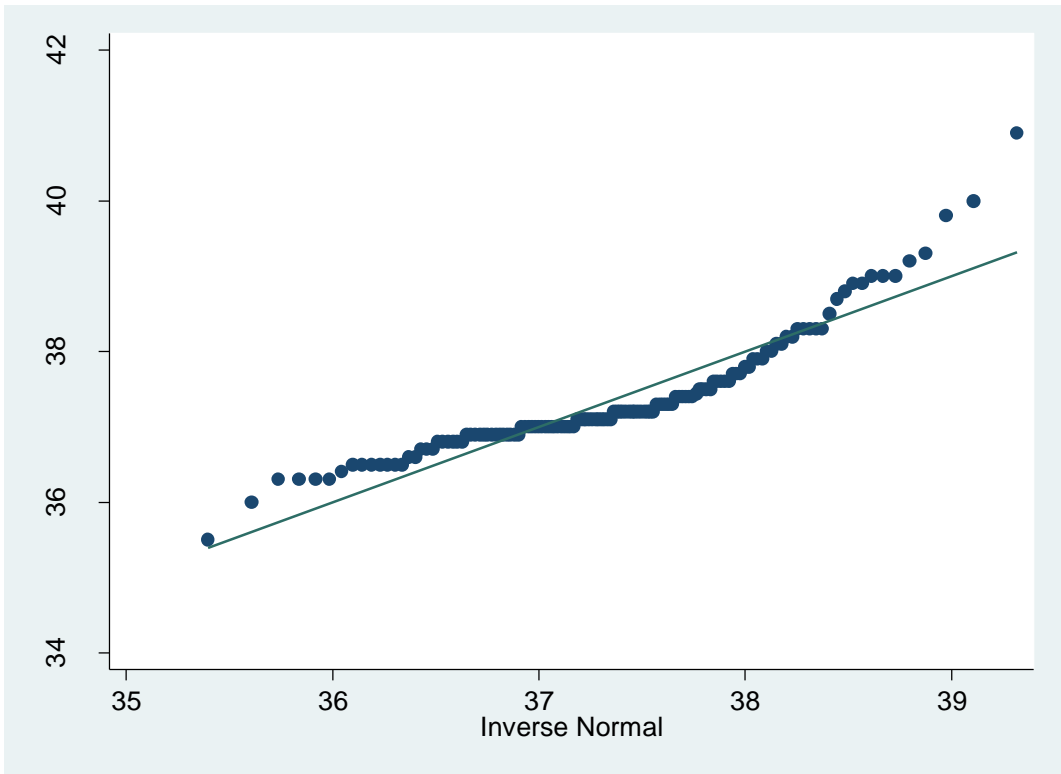

6-11 months

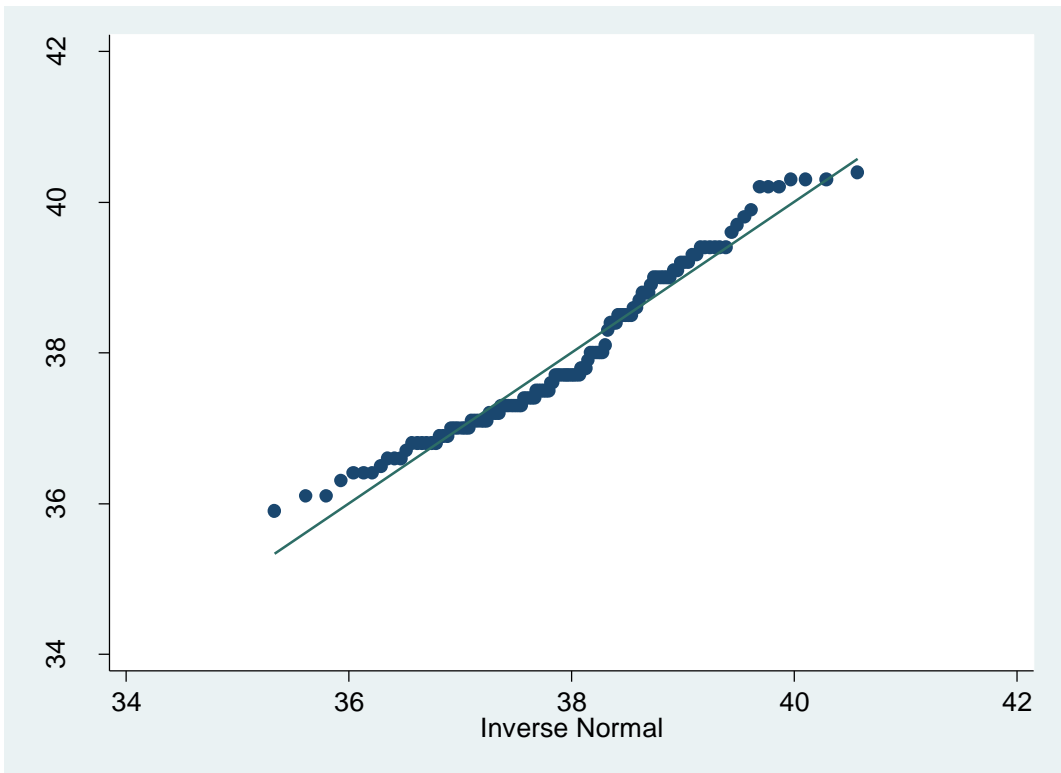

12-35 months

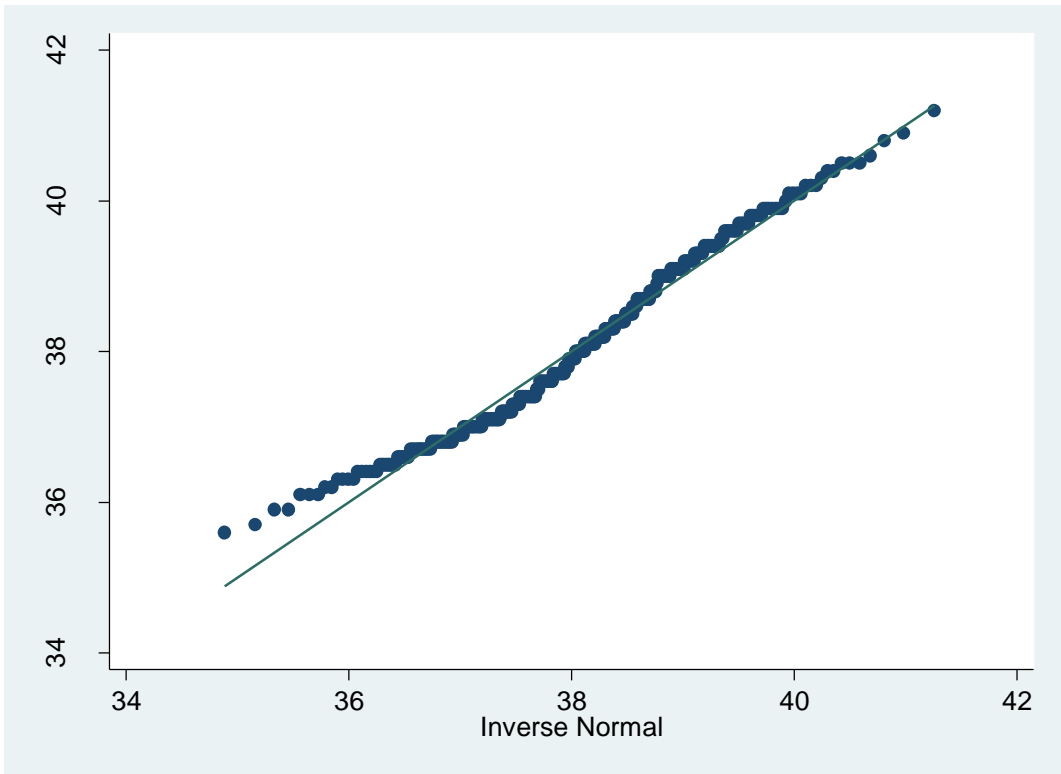

3-5 years

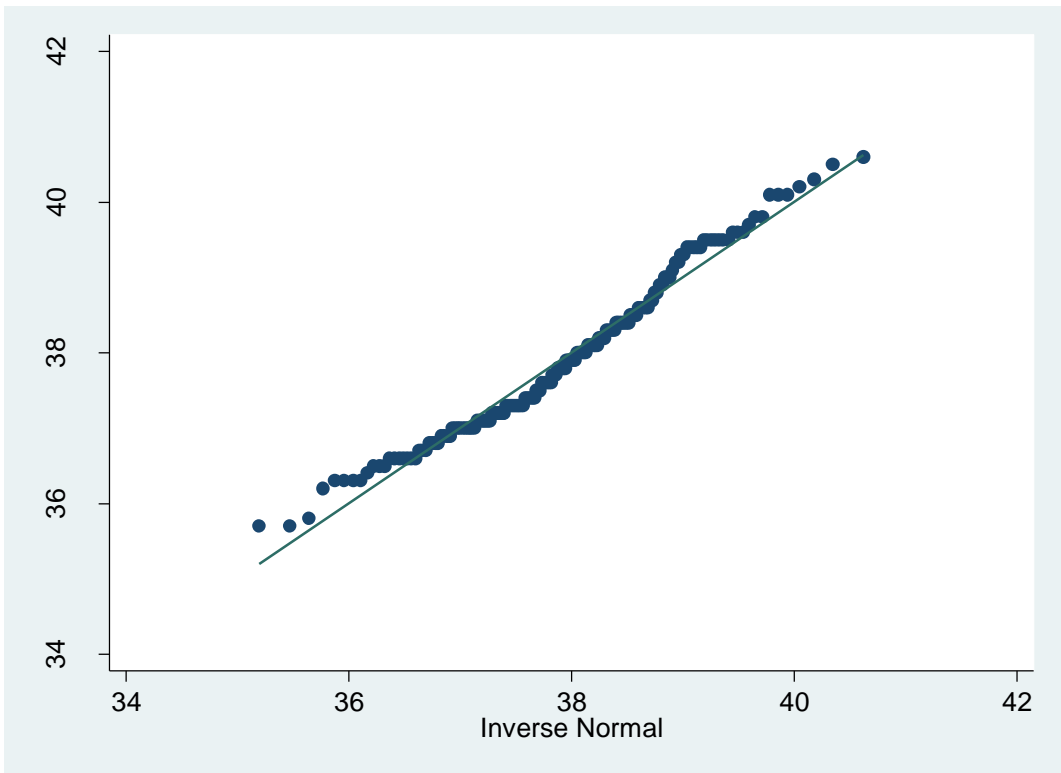

6-11 years

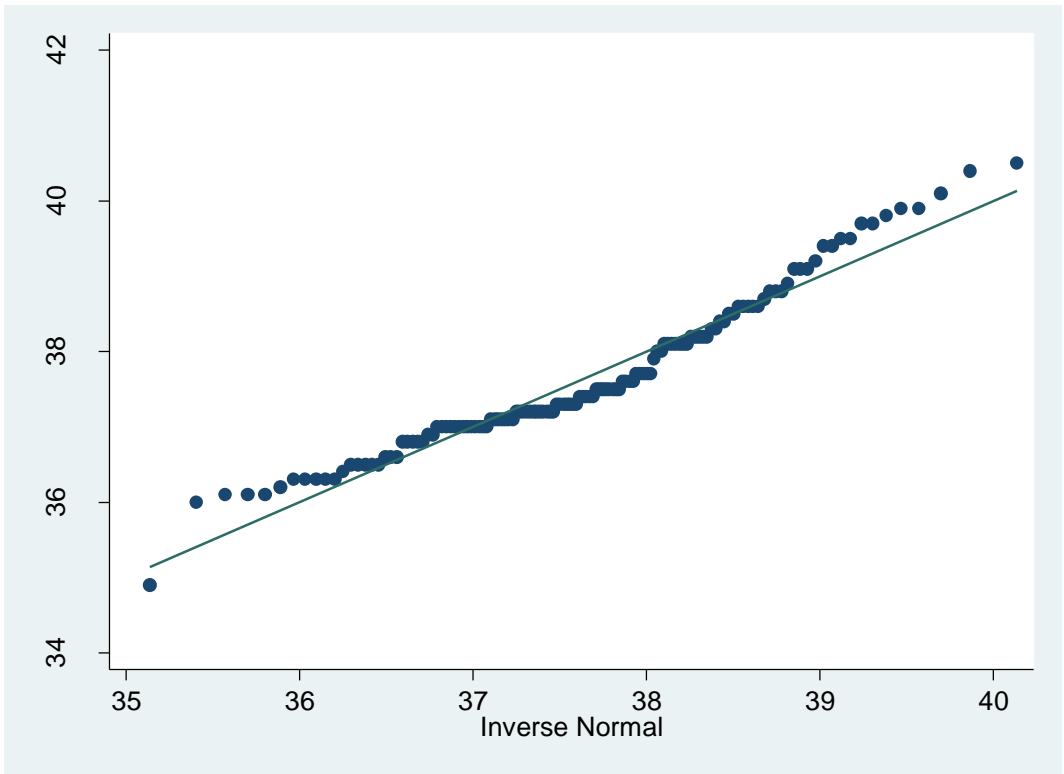

12-18 years

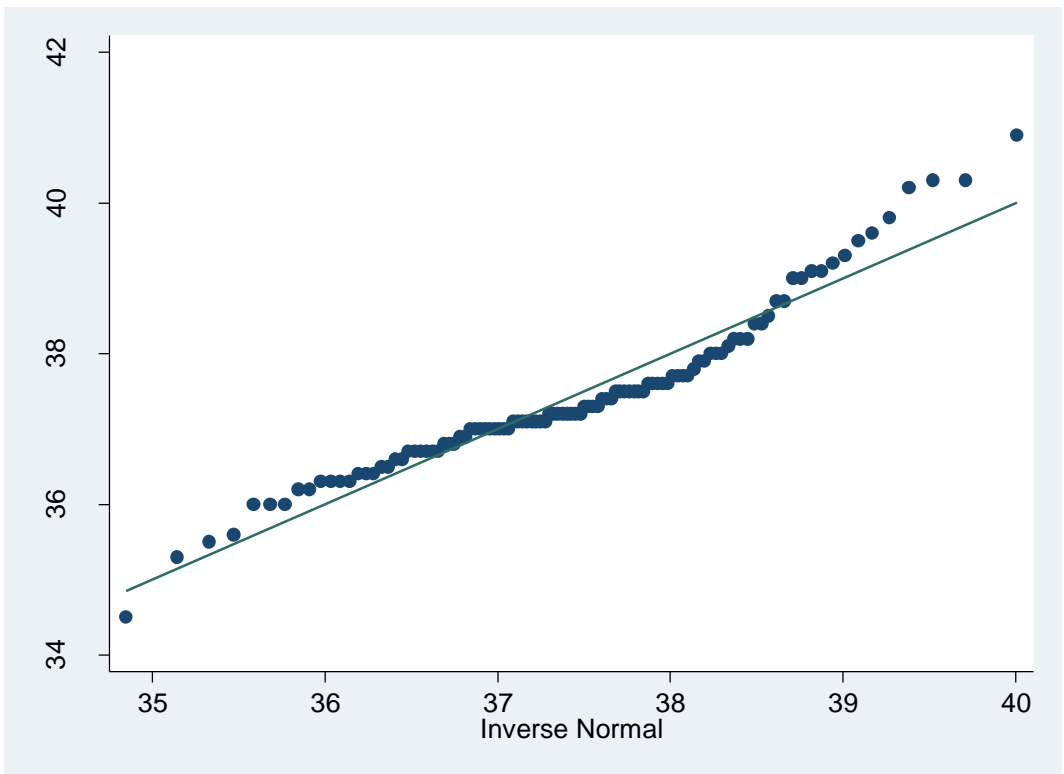

---

We assumed a SD of 0.6 °C.

Our results showed a SD of around 1.0 for the different age groups:

```
. sum tprectal if agegrp == 1
```

| Variable | Obs | Mean     | Std. Dev. | Min  | Max  |
|----------|-----|----------|-----------|------|------|
| tprectal | 136 | 37.35618 | .8024057  | 35.5 | 40.9 |

```
. sum tprectal if agegrp == 2
```

| Variable | Obs | Mean     | Std. Dev. | Min  | Max  |
|----------|-----|----------|-----------|------|------|
| tprectal | 128 | 37.95234 | 1.082863  | 35.9 | 40.4 |

```
. sum tprectal if agegrp == 3
```

| Variable | Obs | Mean     | Std. Dev. | Min  | Max  |
|----------|-----|----------|-----------|------|------|
| tprectal | 320 | 38.07356 | 1.16561   | 35.6 | 41.2 |

```
. sum tprectal if agegrp == 4
```

| Variable | Obs | Mean     | Std. Dev. | Min  | Max  |
|----------|-----|----------|-----------|------|------|
| tprectal | 169 | 37.91006 | 1.077124  | 35.7 | 40.6 |

```
. sum tprectal if agegrp == 5
```

| Variable | Obs | Mean     | Std. Dev. | Min  | Max  |
|----------|-----|----------|-----------|------|------|
| tprectal | 135 | 37.63556 | 1.024438  | 34.9 | 40.5 |

```
. sum tprectal if agegrp == 6
```

| Variable | Obs | Mean    | Std. Dev. | Min  | Max  |
|----------|-----|---------|-----------|------|------|
| tprectal | 107 | 37.4271 | 1.095322  | 34.5 | 40.9 |

```
.  
. sum tpore if agegrp == 1
```

| Variable | Obs | Mean     | Std. Dev. | Min  | Max  |
|----------|-----|----------|-----------|------|------|
| tpore    | 136 | 37.21324 | .7833271  | 35.8 | 40.5 |

```
. sum tpore if agegrp == 2
```

| Variable | Obs | Mean     | Std. Dev. | Min | Max  |
|----------|-----|----------|-----------|-----|------|
| tpore    | 128 | 37.95391 | 1.078122  | 36  | 40.9 |

```
. sum tpore if agegrp == 3
```

| Variable | Obs | Mean     | Std. Dev. | Min  | Max  |
|----------|-----|----------|-----------|------|------|
| tpore    | 320 | 38.08531 | 1.134692  | 35.5 | 41.1 |

```
. sum tpore if agegrp == 4
```

| Variable | Obs | Mean | Std. Dev. | Min | Max  |
|----------|-----|------|-----------|-----|------|
| tpore    | 169 | 38.1 | 1.030372  | 36  | 41.1 |

```
. sum tpore if agegrp == 5
```

| Variable | Obs | Mean     | Std. Dev. | Min | Max |
|----------|-----|----------|-----------|-----|-----|
| tpore    | 135 | 37.81481 | .9723428  | 36  | 41  |

```
. sum tpore if agegrp == 6
```

| Variable | Obs | Mean    | Std. Dev. | Min | Max  |
|----------|-----|---------|-----------|-----|------|
| tpore    | 107 | 37.4757 | .9783352  | 35  | 40.9 |

```
.  
end of do-file  
.
```

We conclude, that due to the higher standard deviation than expected, our study size where 104-169 children were included in the subgroups will only have a 90% power to detect significant differences higher than 0.4- 0.45 °C instead of 0.3 °C.

The screenshot shows the OpenEpi calculator interface. The left sidebar contains a tree view of various statistical tools. The main window displays the 'Sample Size For Comparing Two Means' calculator. The 'Input Data' section is highlighted in cyan and shows: Confidence Interval (2-sided) 95%, Power 90%, and Ratio of sample size (Group 2/Group 1) 1. Below this, a table shows the input parameters for Group 1 and Group 2, with a difference of 0.45. The resulting sample sizes are 104 for each group, totaling 208.

|                    | Group 1 | Group 2 | Difference* |
|--------------------|---------|---------|-------------|
| Mean               |         |         | 0.45        |
| Standard deviation | 1       | 1       |             |
| Variance           | 1       | 1       |             |

  

|                        |     |
|------------------------|-----|
| Sample size of Group 1 | 104 |
| Sample size of Group 2 | 104 |
| Total sample size      | 208 |

\*Difference between the means

Results from OpenEpi, Version 3, open source calculator--SSMean  
Print from the browser with ctrl-P  
or select text to copy and paste to other programs.

The screenshot shows the OpenEpi calculator interface. The left sidebar contains a tree view of various statistical tools. The main window displays the 'Sample Size For Comparing Two Means' calculator. The 'Input Data' section is highlighted in cyan and shows: Confidence Interval (2-sided) 95%, Power 90%, and Ratio of sample size (Group 2/Group 1) 1. Below this, a table shows the input parameters for Group 1 and Group 2, with a difference of 0.4. The resulting sample sizes are 132 for each group, totaling 264.

|                    | Group 1 | Group 2 | Difference* |
|--------------------|---------|---------|-------------|
| Mean               |         |         | 0.4         |
| Standard deviation | 1       | 1       |             |
| Variance           | 1       | 1       |             |

  

|                        |     |
|------------------------|-----|
| Sample size of Group 1 | 132 |
| Sample size of Group 2 | 132 |
| Total sample size      | 264 |

\*Difference between the means

Results from OpenEpi, Version 3, open source calculator--SSMean  
Print from the browser with ctrl-P  
or select text to copy and paste to other programs.
